# Supplementary material for: Cellular Plasticity Enables Adaptation to Unforeseen Cell-Cycle Rewiring Challenges
Source: PLOS journal article supplement (doi:10.1371/journal.pone.0045184), 2012-09-18
Supplement: S4 (10.1371/journal.pone.0045184.s004) [file journal.pone.0045184.s004]

# pSwi4-*HIS3*

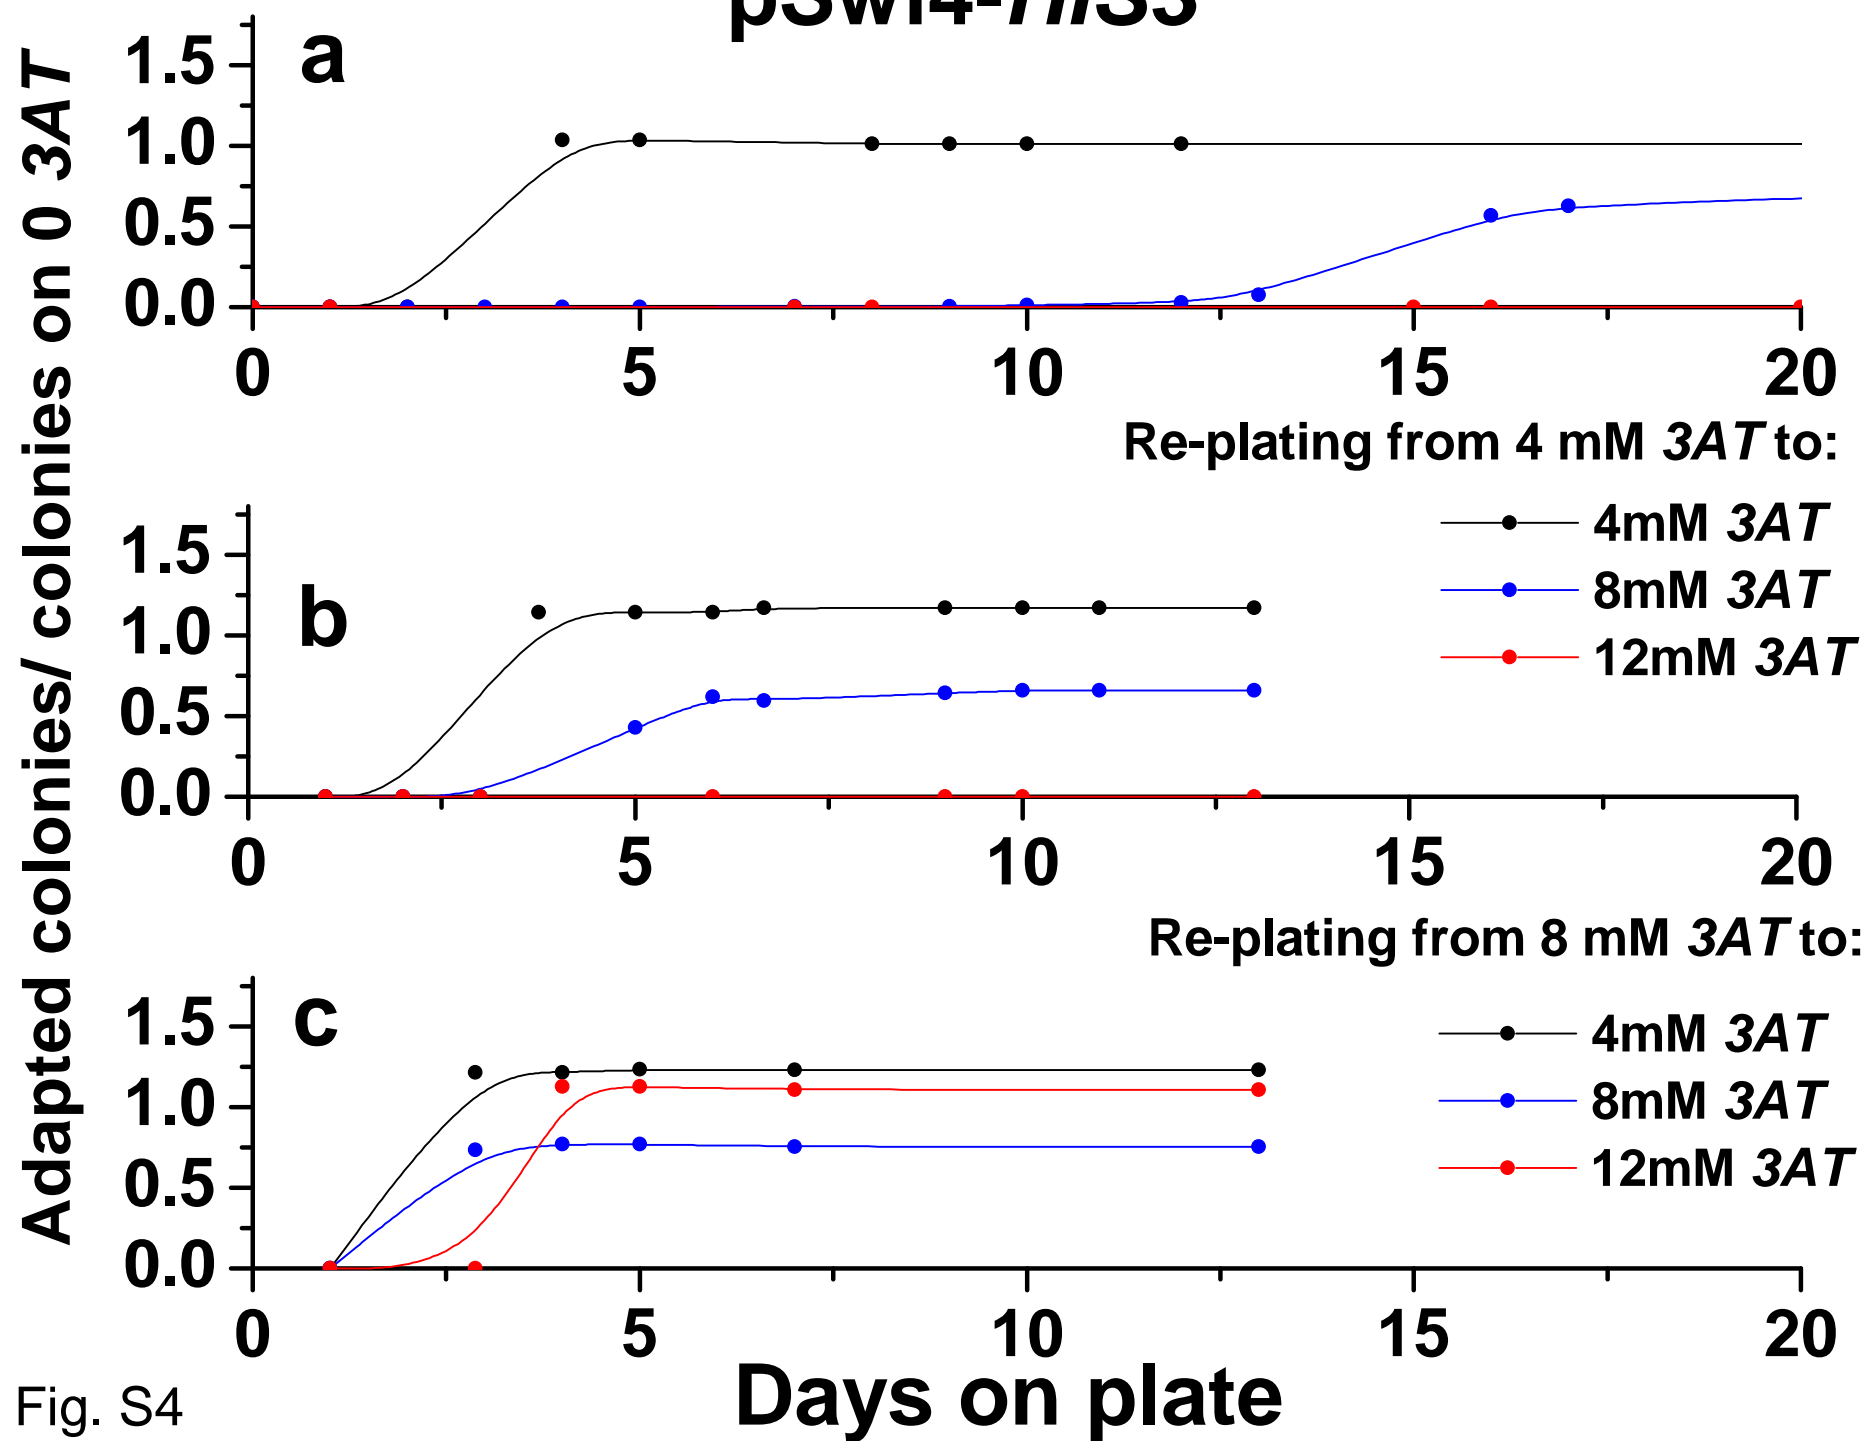

Fig. S4
