# Supplementary material for: Cellular Plasticity Enables Adaptation to Unforeseen Cell-Cycle Rewiring Challenges
Source: PLOS journal article supplement (doi:10.1371/journal.pone.0045184), 2012-09-18
Supplement: S11 (10.1371/journal.pone.0045184.s011) [file journal.pone.0045184.s011]

| Induced cluster (616 genes)                 |                 |         | Repressed cluster (562 genes) |                 |          |
|---------------------------------------------|-----------------|---------|-------------------------------|-----------------|----------|
| GO term                                     | Number of genes | P value | GO term                       | Number of genes | P value  |
| No significant ontology term could be found |                 |         | cytoplasmic translation       | 46 (8.3%)       | 5.22E-07 |
|                                             |                 |         | transposition, RNA-mediated   | 15 (2.7%)       | 0.00288  |
