# Supplementary material for: Cellular Plasticity Enables Adaptation to Unforeseen Cell-Cycle Rewiring Challenges
Source: PLOS journal article supplement (doi:10.1371/journal.pone.0045184), 2012-09-18
Supplement: S12 (10.1371/journal.pone.0045184.s012) [file journal.pone.0045184.s012]

| Induced cluster (1051 genes) |                 |          | Repressed cluster (835 genes)               |                 |         |
|------------------------------|-----------------|----------|---------------------------------------------|-----------------|---------|
| GO term                      | Number of genes | P value  | GO term                                     | Number of genes | P value |
| cytoplasmic translation      | 74 (7.1%)       | 2.83E-15 | No significant ontology term could be found |                 |         |
| translation                  | 112 (10.7%)     | 3.04E-06 |                                             |                 |         |
